# Supplementary material for: A Joint Modeling Approach for Childhood Meat, Fish and Egg Consumption and the Risk of Advanced Islet Autoimmunity
Source: PubMed Central journal article supplement (PMC6533366; doi:10.1038/s41598-019-44196-1), 2019-05-23
Supplement: 41598_2019_44196_MOESM1_ESM.pdf [file 41598_2019_44196_MOESM1_ESM.pdf]

Supplementary information for “A Joint  
Modeling Approach for Childhood Meat, Fish  
and Egg Consumption and the Risk of  
Advanced Islet Autoimmunity”

Essi Syrjälä, Jaakko Nevalainen, Jaakko Peltonen, Hanna-Mari Takkinen,  
Leena Hakola, Mari Åkerlund, Riitta Veijola, Jorma Ilonen,  
Jorma Toppari, Mikael Knip, Suvi M. Virtanen

Supplementary Table S 1: Frequency table of the genetic risk and familial diabetes, Fisher’s exact test  $P=0.283$ .

|                   |     | Genetic risk |            |
|-------------------|-----|--------------|------------|
|                   |     | Moderate     | High       |
| Familial diabetes | No  | 4027 (80.5)  | 974 (19.5) |
|                   | Yes | 257 (78.1)   | 72 (21.9)  |

Supplementary Table S 2: Distributions of the confounding factors in the two latent classes of fish consumption and the risk of advanced islet autoimmunity (IA) based on the adjusted joint latent class mixed model (JLCMM).

|                                | Low consumers <sup>1</sup><br>N=4619 | High consumers <sup>1</sup><br>N=926 |
|--------------------------------|--------------------------------------|--------------------------------------|
| Sex of the child               |                                      |                                      |
| Boy                            | 2447 (53.0)                          | 503 (54.1)                           |
| Girl                           | 2169 (47.0)                          | 426 (45.9)                           |
| Genetic risk                   |                                      |                                      |
| Moderate                       | 3700 (80.2)                          | 757 (81.5)                           |
| High                           | 916 (19.8)                           | 172 (18.5)                           |
| Familial diabetes              |                                      |                                      |
| No                             | 4143 (93.8)                          | 858 (94.1)                           |
| Yes                            | 275 (6.2)                            | 54 (5.9)                             |
| Mother's vocational education  |                                      |                                      |
| None                           | 318 (6.9)                            | 36 (3.9)                             |
| Vocational school or course    | 1268 (27.5)                          | 197 (21.2)                           |
| Secondary vocational education | 1941 (42.0)                          | 416 (44.8)                           |
| University studies or degree   | 941 (20.4)                           | 269 (29.0)                           |
| Missing information            | 148 (3.2)                            | 11 (1.2)                             |

<sup>1</sup>Values are class frequencies with proportions in the parentheses

Supplementary Table S 3: Hazard ratios with 95% CIs of the confounding factors associated with the advanced islet autoimmunity (IA) from the basic joint models (JMs) and from the joint latent class mixed model (JLCMM).

| Characteristic      | JM meat           | JM fish           | JM egg            | JLCMM fish        |
|---------------------|-------------------|-------------------|-------------------|-------------------|
| Sex of the child    |                   |                   |                   |                   |
| Boy                 | 1                 | 1                 | 1                 | 1                 |
| Girl                | 0.74 (0.58, 0.96) | 0.73 (0.57, 0.94) | 0.73 (0.57, 0.94) | 0.70 (0.57, 0.87) |
| Genetic risk        |                   |                   |                   |                   |
| Moderate            | 1                 | 1                 | 1                 | 1                 |
| High                | 1.93 (1.48, 2.52) | 1.92 (1.47, 2.51) | 1.92 (1.47, 2.51) | 2.19 (1.76, 2.73) |
| Familial diabetes   |                   |                   |                   |                   |
| No                  | 1                 | 1                 | 1                 | 1                 |
| Yes                 | 2.11 (1.44, 3.09) | 2.12 (1.44, 3.10) | 2.13 (1.46, 3.13) | 2.02 (1.46, 2.81) |
| Missing information | 0.71 (0.32, 1.61) | 0.72 (0.32, 1.62) | 0.72 (0.32, 1.61) | 0.69 (0.35, 1.35) |

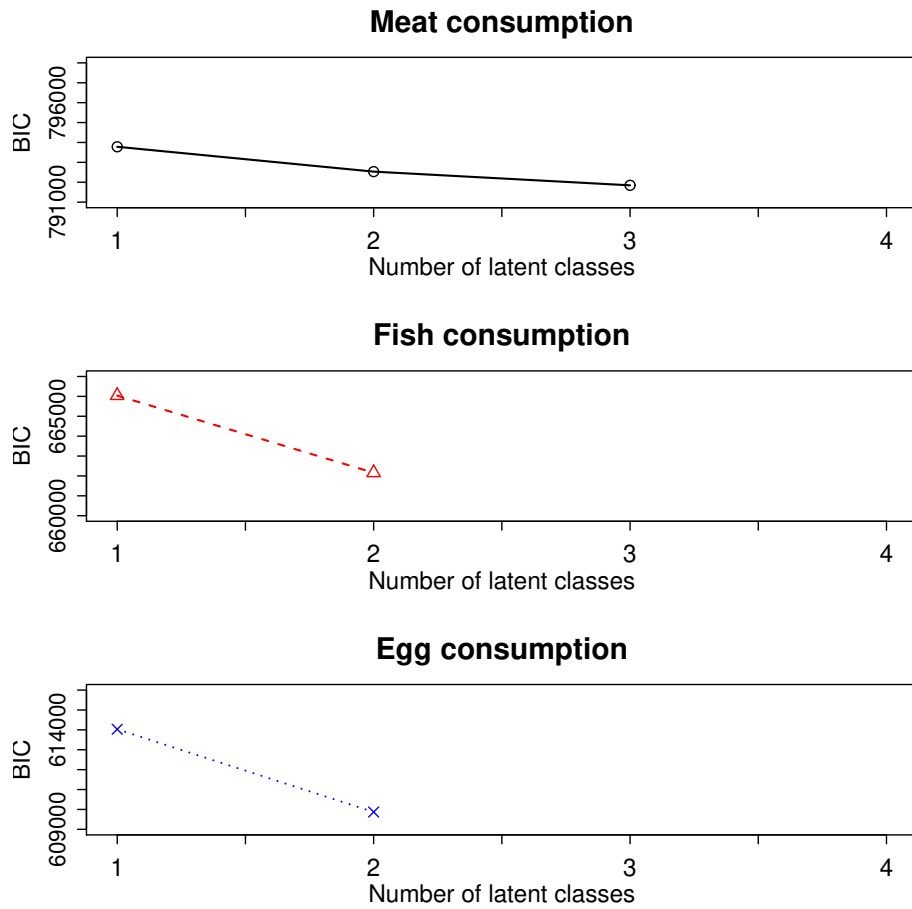

Supplementary Figure S 1: BIC curves for converged joint latent class mixed models with different number of latent classes for the consumption of meat, fish and eggs, and the risk of advanced islet autoimmunity (IA).

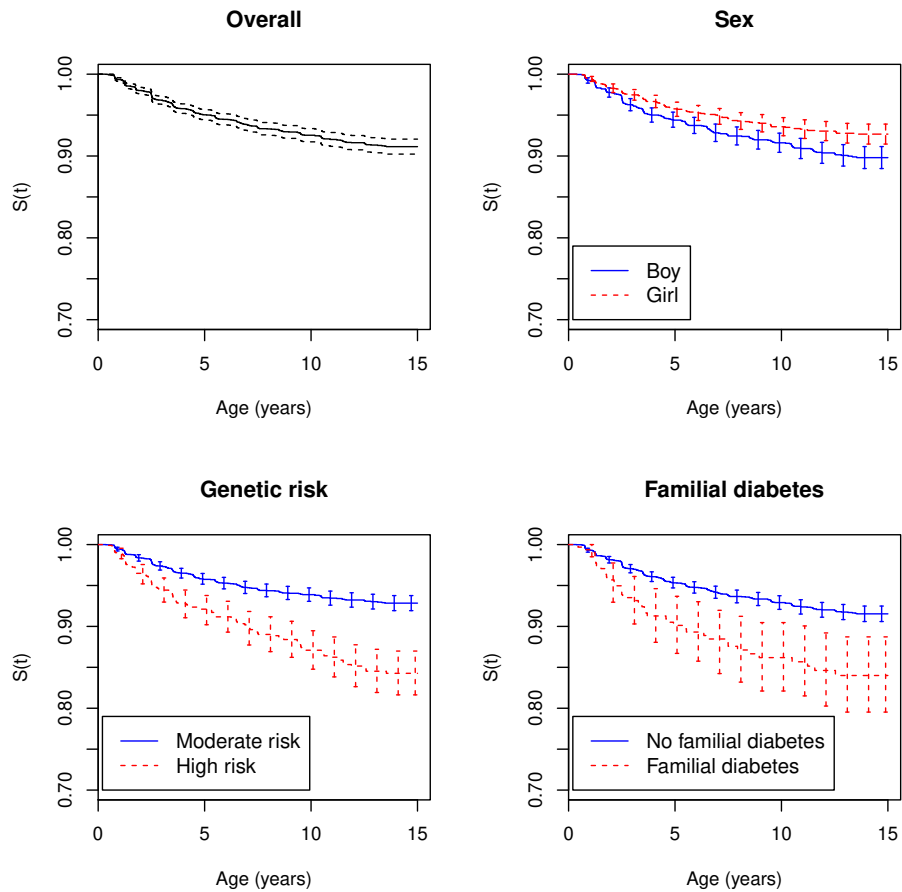

Supplementary Figure S 2: Kaplan-Meier curves with 95% CIs for advanced islet autoimmunity (IA): Overall curve and curves by sex of the child, genetic risk of the child and familial diabetes.

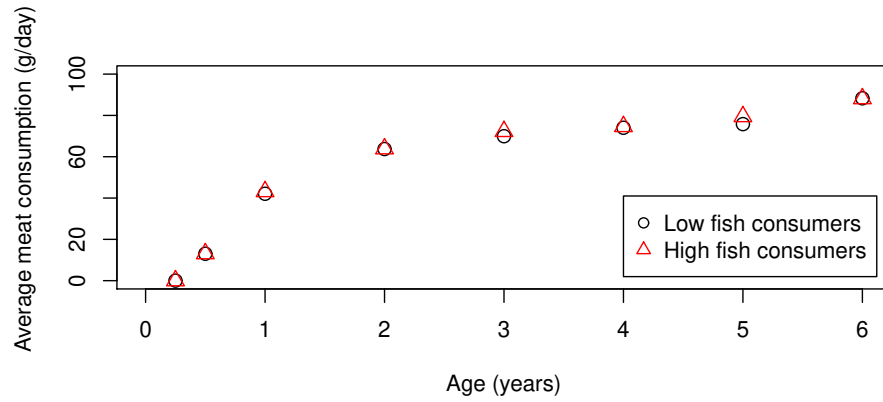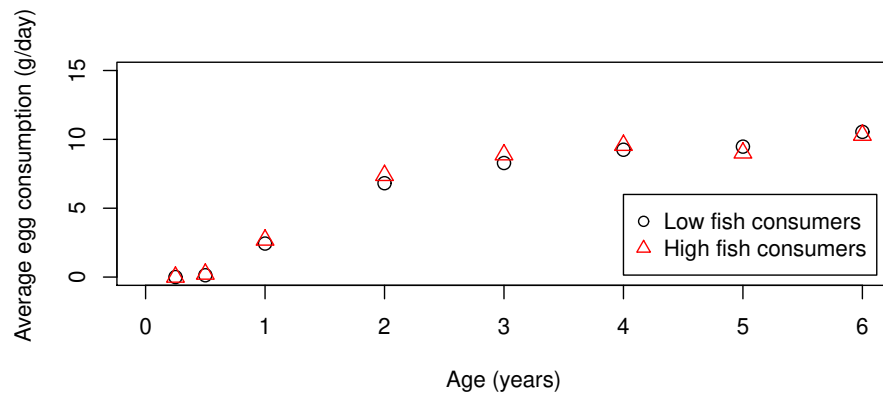

Supplementary Figure S 3: Average consumption of meat and eggs at the different ages in the two latent classes of fish consumption and the risk of advanced islet autoimmunity (IA) based on the adjusted joint latent class mixed model (JLCMM).

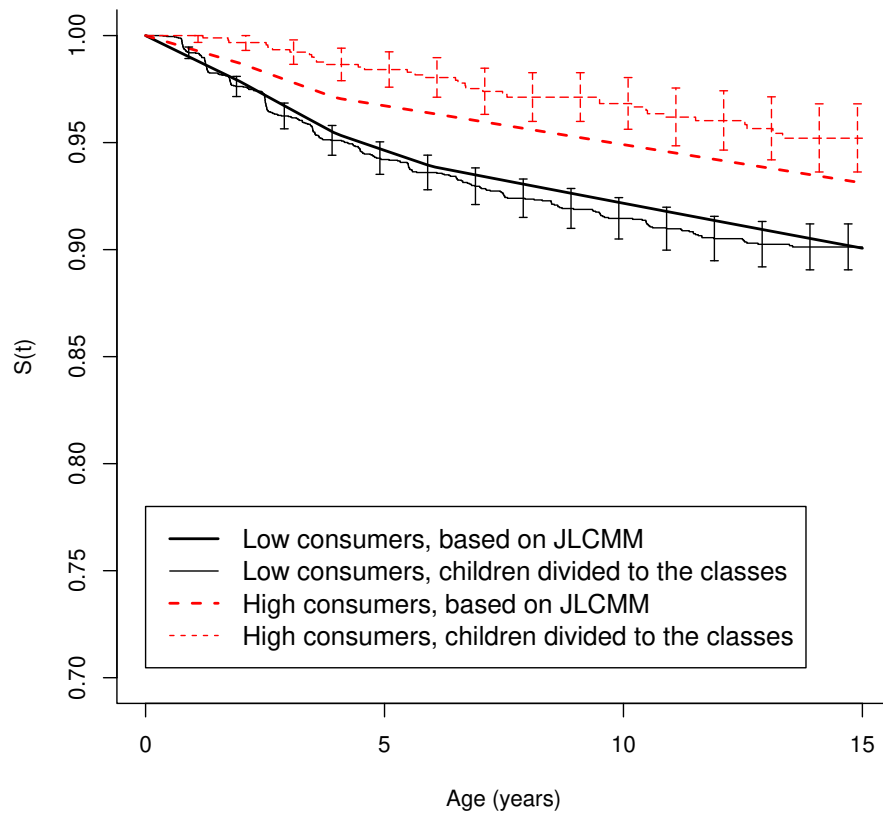

Supplementary Figure S 4: Kaplan-Meier curves for advanced islet autoimmunity (IA) by two latent classes of fish consumption based on the adjusted joint latent class mixed model (JLCMM). Model based advanced IA-free survival and crude estimates with hard assignment of children to the most probable class (with 95% CIs).
